# Supplementary material for: Ultrasonography-based reference values for the cross-sectional area of the thyroid gland in children and adolescents: The Fukushima Health Management Survey
Source: PubMed Central journal article supplement — Clin Pediatr Endocrinol. 2022 Oct 15;32(1):52–7. doi: 10.1297/cpe.2022-0057 (PMC9887296; doi:10.1297/cpe.2022-0057), 2022-10-15
Supplement: cpe-32-052-s001.pdf [file cpe-32-052-s001.pdf]

Supplementary Table 1

| girls |            |     |           |     | boys           |     |           |     |      |     |            |     |           |     |                |     |           |     |       |
|-------|------------|-----|-----------|-----|----------------|-----|-----------|-----|------|-----|------------|-----|-----------|-----|----------------|-----|-----------|-----|-------|
| Age   | Width (mm) |     |           |     | Thickness (mm) |     |           |     | n    | Age | Width (mm) |     |           |     | Thickness (mm) |     |           |     | n     |
|       | right lobe |     | left lobe |     | right lobe     |     | left lobe |     |      |     | right lobe |     | left lobe |     | right lobe     |     | left lobe |     |       |
|       | mean       | SD  | mean      | SD  | mean           | SD  | mean      | SD  |      |     | mean       | SD  | mean      | SD  | mean           | SD  | mean      | SD  |       |
| 0     | 7.9        | 2.1 | 8.0       | 2.0 | 7.5            | 2.0 | 7.9       | 2.1 | 127  | 0   | 7.9        | 2.1 | 8.3       | 1.9 | 7.5            | 2.1 | 7.1       | 1.9 | 148   |
| 1     | 8.3        | 1.9 | 8.7       | 1.9 | 8.1            | 1.9 | 8.3       | 1.9 | 1701 | 1   | 8.5        | 2.0 | 9.0       | 1.9 | 8.1            | 1.8 | 7.5       | 1.9 | 1838  |
| 2     | 8.5        | 1.5 | 9.0       | 1.9 | 8.2            | 1.8 | 8.5       | 1.5 | 5446 | 2   | 8.7        | 1.9 | 9.3       | 1.9 | 8.3            | 1.9 | 7.4       | 2.0 | 5761  |
| 3     | 8.8        | 1.9 | 9.4       | 1.8 | 8.4            | 1.8 | 8.8       | 1.9 | 8485 | 3   | 9.0        | 1.9 | 9.7       | 1.9 | 8.4            | 1.8 | 7.2       | 1.9 | 8997  |
| 4     | 9.3        | 1.9 | 9.8       | 1.9 | 8.6            | 1.8 | 9.3       | 1.9 | 8266 | 4   | 9.5        | 2.0 | 10.1      | 1.9 | 8.6            | 1.8 | 7.3       | 1.8 | 8711  |
| 5     | 9.8        | 2.0 | 10.2      | 2.0 | 8.9            | 1.8 | 9.8       | 2.0 | 7509 | 5   | 9.9        | 2.0 | 10.4      | 1.9 | 8.8            | 1.8 | 7.5       | 1.8 | 7808  |
| 6     | 10.4       | 2.2 | 10.8      | 2.0 | 9.1            | 1.9 | 10.4      | 2.2 | 8829 | 6   | 10.6       | 2.2 | 11.0      | 2.0 | 9.1            | 1.8 | 7.7       | 1.8 | 9405  |
| 7     | 11.1       | 2.3 | 11.3      | 2.2 | 9.6            | 1.9 | 11.1      | 2.3 | 9203 | 7   | 11.2       | 2.3 | 11.6      | 2.2 | 9.4            | 1.9 | 7.9       | 1.9 | 9768  |
| 8     | 11.6       | 2.4 | 11.8      | 2.3 | 9.9            | 2.0 | 11.6      | 2.4 | 9196 | 8   | 11.8       | 2.5 | 12.0      | 2.2 | 9.8            | 2.0 | 8.3       | 1.9 | 9493  |
| 9     | 12.1       | 2.6 | 12.2      | 2.3 | 10.4           | 2.2 | 12.1      | 2.6 | 8928 | 9   | 12.2       | 2.5 | 12.4      | 2.3 | 10.1           | 2.1 | 8.6       | 2.0 | 9370  |
| 10    | 12.8       | 2.8 | 12.7      | 2.6 | 11.1           | 2.4 | 12.8      | 2.8 | 9047 | 10  | 12.7       | 2.6 | 12.8      | 2.4 | 10.5           | 2.2 | 8.9       | 2.1 | 9736  |
| 11    | 13.5       | 2.9 | 13.3      | 2.6 | 11.8           | 2.5 | 13.5      | 2.9 | 9588 | 11  | 13.3       | 2.8 | 13.2      | 2.5 | 11.1           | 2.4 | 9.5       | 2.3 | 9802  |
| 12    | 14.2       | 3.1 | 14.0      | 2.8 | 12.2           | 2.6 | 14.2      | 3.1 | 9519 | 12  | 13.8       | 2.9 | 13.6      | 2.6 | 11.8           | 2.6 | 10.1      | 2.5 | 10183 |
| 13    | 14.4       | 3.1 | 14.3      | 2.7 | 12.2           | 2.6 | 14.4      | 3.1 | 9579 | 13  | 14.3       | 3.0 | 14.0      | 2.6 | 12.4           | 2.7 | 10.7      | 2.6 | 9929  |
| 14    | 14.6       | 3.1 | 14.4      | 2.7 | 12.4           | 2.6 | 14.6      | 3.1 | 9641 | 14  | 14.7       | 3.1 | 14.3      | 2.7 | 13.0           | 2.7 | 11.2      | 2.7 | 10128 |
| 15    | 14.8       | 3.1 | 14.6      | 2.8 | 12.4           | 2.6 | 14.8      | 3.1 | 7891 | 15  | 15.1       | 3.2 | 14.7      | 2.8 | 13.4           | 2.8 | 11.6      | 2.7 | 8024  |
| 16    | 14.7       | 3.1 | 14.6      | 2.8 | 12.4           | 2.6 | 14.7      | 3.1 | 7974 | 16  | 15.3       | 3.2 | 15.0      | 2.8 | 13.6           | 2.8 | 11.7      | 2.7 | 7752  |
| 17    | 15.0       | 3.2 | 14.8      | 2.8 | 12.5           | 2.7 | 15.0      | 3.2 | 8741 | 17  | 15.7       | 3.3 | 15.3      | 2.9 | 13.9           | 2.9 | 12.1      | 2.7 | 8787  |
| 18    | 15.1       | 3.2 | 15.0      | 2.9 | 12.4           | 2.7 | 15.1      | 3.2 | 7447 | 18  | 15.9       | 3.3 | 15.5      | 2.9 | 13.9           | 2.9 | 12.1      | 2.8 | 7220  |
| 19    | 15.1       | 3.3 | 15.1      | 2.9 | 12.4           | 2.7 | 15.1      | 3.3 | 5866 | 19  | 16.0       | 3.4 | 15.7      | 2.9 | 13.9           | 2.9 | 12.0      | 2.8 | 4896  |
| 20    | 15.2       | 3.3 | 15.2      | 2.9 | 12.5           | 2.7 | 15.2      | 3.3 | 3930 | 20  | 16.3       | 3.4 | 15.9      | 3.0 | 14.1           | 3.0 | 12.2      | 2.8 | 3178  |

Supplementary Table 2

| girls |            | Width (mm) |      |            |           | Thickness (mm) |            |           |       | n   | boys |            | Width (mm) |      |            |           | Thickness (mm) |            |           |     | n |
|-------|------------|------------|------|------------|-----------|----------------|------------|-----------|-------|-----|------|------------|------------|------|------------|-----------|----------------|------------|-----------|-----|---|
| BSA   | right lobe | left lobe  |      | right lobe | left lobe |                | right lobe | left lobe |       |     | BSA  | right lobe | left lobe  |      | right lobe | left lobe |                | right lobe | left lobe |     |   |
|       | mean       | SD         | mean | SD         | mean      | SD             | mean       | SD        |       |     | mean | SD         | mean       | SD   | mean       | SD        | mean           | SD         | mean      | SD  |   |
| 0.3   | 7.4        | 1.5        | 7.7  | 1.2        | 7.3       | 1.9            | 7.4        | 1.6       | 14    | 0.3 | 8.5  | 1.6        | 7.1        | 1.5  | 6.3        | 1.8       | 6.9            | 1.5        | 6         |     |   |
| 0.4   | 8.1        | 1.6        | 8.5  | 1.6        | 8.0       | 1.6            | 7.5        | 1.7       | 1190  | 0.4 | 8.2  | 1.7        | 8.7        | 1.6  | 7.9        | 1.6       | 7.3            | 1.6        | 823       |     |   |
| 0.5   | 8.4        | 1.3        | 8.9  | 1.5        | 8.2       | 1.5            | 7.3        | 1.7       | 6220  | 0.5 | 8.6  | 1.6        | 9.2        | 1.5  | 8.2        | 1.5       | 7.3            | 1.6        | 5717      |     |   |
| 0.6   | 8.9        | 1.6        | 9.5  | 1.5        | 8.4       | 1.5            | 7.2        | 1.6       | 11792 | 0.6 | 9.0  | 1.6        | 9.7        | 1.5  | 8.4        | 1.5       | 7.2            | 1.6        | 12629     |     |   |
| 0.7   | 9.6        | 1.6        | 10.1 | 1.6        | 8.8       | 1.5            | 7.5        | 1.5       | 11864 | 0.7 | 9.7  | 1.6        | 10.2       | 1.6  | 8.7        | 1.5       | 7.3            | 1.5        | 12450     |     |   |
| 0.8   | 10.4       | 1.8        | 10.8 | 1.7        | 9.2       | 1.5            | 7.8        | 1.5       | 12130 | 0.8 | 10.5 | 1.8        | 11.0       | 1.7  | 9.1        | 1.5       | 7.6            | 1.5        | 12377     |     |   |
| 0.9   | 11.1       | 1.8        | 11.4 | 1.7        | 9.7       | 1.6            | 8.3        | 1.6       | 11528 | 0.9 | 11.2 | 1.9        | 11.6       | 1.7  | 9.5        | 1.6       | 7.9            | 1.6        | 12136     |     |   |
| 1     | 11.8       | 2.0        | 12.0 | 1.8        | 10.2      | 1.7            | 8.7        | 1.7       | 10480 | 1   | 11.9 | 2.0        | 12.1       | 1.8  | 9.9        | 1.6       | 8.4            | 1.6        | 11592     |     |   |
| 1.1   | 12.5       | 2.1        | 12.4 | 1.9        | 10.8      | 1.8            | 9.3        | 1.8       | 8935  | 1.1 | 12.4 | 2.0        | 12.6       | 1.9  | 10.3       | 1.7       | 8.7            | 1.7        | 10632     |     |   |
| 1.2   | 13.1       | 2.2        | 13.1 | 2.0        | 11.5      | 1.9            | 9.9        | 1.9       | 8725  | 1.2 | 13.0 | 2.1        | 13.0       | 1.9  | 10.8       | 1.8       | 9.2            | 1.8        | 9416      |     |   |
| 1.3   | 13.8       | 2.3        | 13.7 | 2.1        | 11.9      | 2.0            | 10.3       | 2.0       | 13357 | 1.3 | 13.5 | 2.2        | 13.4       | 2.0  | 11.4       | 2.0       | 9.8            | 1.9        | 8590      |     |   |
| 1.4   | 14.3       | 2.4        | 14.3 | 2.1        | 12.2      | 2.1            | 10.5       | 2.0       | 22338 | 1.4 | 13.9 | 2.2        | 13.8       | 2.0  | 12.2       | 2.1       | 10.4           | 2.0        | 8715      |     |   |
| 1.5   | 14.8       | 2.5        | 14.8 | 2.2        | 12.5      | 2.1            | 10.7       | 2.1       | 21862 | 1.5 | 14.4 | 2.3        | 14.2       | 2.1  | 12.8       | 2.2       | 11.0           | 2.1        | 11195     |     |   |
| 1.6   | 15.3       | 2.5        | 15.1 | 2.2        | 12.8      | 2.2            | 11.0       | 2.1       | 11328 | 1.6 | 14.9 | 2.4        | 14.7       | 2.1  | 13.3       | 2.2       | 11.4           | 2.1        | 15047     |     |   |
| 1.7   | 15.8       | 2.7        | 15.6 | 2.4        | 13.2      | 2.3            | 11.4       | 2.2       | 3681  | 1.7 | 15.4 | 2.5        | 15.1       | 2.2  | 13.7       | 2.2       | 11.8           | 2.2        | 13795     |     |   |
| 1.8   | 16.4       | 2.9        | 16.1 | 2.7        | 13.6      | 2.4            | 11.8       | 2.4       | 1109  | 1.8 | 15.9 | 2.6        | 15.6       | 2.3  | 14.0       | 2.3       | 12.1           | 2.3        | 8970      |     |   |
| 1.9   | 17.2       | 2.9        | 16.5 | 2.5        | 14.1      | 2.5            | 12.2       | 2.4       | 305   | 1.9 | 16.4 | 2.7        | 16.0       | 2.3  | 14.3       | 2.4       | 12.5           | 2.3        | 4001      |     |   |
| 2     | 16.5       | 2.9        | 16.5 | 2.6        | 14.2      | 2.4            | 12.2       | 2.6       | 54    | 2   | 17.0 | 2.8        | 16.4       | 2.5  | 14.7       | 2.4       | 12.6           | 2.4        | 1751      |     |   |
|       |            |            |      |            |           |                |            |           |       |     | 2.1  | 17.8       | 2.8        | 16.8 | 2.5        | 15.0      | 2.5            | 13.2       | 2.4       | 730 |   |
|       |            |            |      |            |           |                |            |           |       |     | 2.2  | 17.7       | 3.1        | 17.2 | 2.6        | 15.0      | 2.7            | 13.2       | 2.6       | 309 |   |
|       |            |            |      |            |           |                |            |           |       |     | 2.3  | 18.5       | 2.7        | 17.6 | 2.7        | 15.3      | 2.4            | 13.6       | 2.5       | 53  |   |

Supplementary Table 3

| Age | BWTAR <sup>1)</sup> (mm <sup>2</sup> ) |      |      |       |       |       |
|-----|----------------------------------------|------|------|-------|-------|-------|
|     | girls                                  |      |      | boys  |       |       |
|     | mean                                   | SD   | n    | mean  | SD    | n     |
| 0   | 117.8                                  | 39.1 | 127  | 114.2 | 37.1  | 148   |
| 1   | 132.4                                  | 38.9 | 1701 | 135.1 | 39.5  | 1838  |
| 2   | 134.6                                  | 36.9 | 5446 | 139.6 | 37.7  | 5761  |
| 3   | 141.3                                  | 36.2 | 8485 | 143.8 | 37.0  | 8997  |
| 4   | 151.4                                  | 37.3 | 8266 | 153.1 | 37.5  | 8711  |
| 5   | 163.4                                  | 39.8 | 7509 | 164.3 | 39.4  | 7808  |
| 6   | 177.4                                  | 42.6 | 8829 | 179.4 | 42.2  | 9405  |
| 7   | 196.2                                  | 48.2 | 9203 | 194.9 | 46.3  | 9768  |
| 8   | 211.6                                  | 52.1 | 9196 | 212.6 | 50.9  | 9493  |
| 9   | 232.3                                  | 59.6 | 8928 | 228.1 | 54.8  | 9370  |
| 10  | 258.7                                  | 68.8 | 9047 | 245.9 | 60.6  | 9736  |
| 11  | 291.2                                  | 75.8 | 9588 | 270.3 | 68.9  | 9802  |
| 12  | 314.6                                  | 80.1 | 9519 | 297.5 | 75.7  | 10183 |
| 13  | 324.2                                  | 80.8 | 9579 | 325.0 | 81.0  | 9929  |
| 14  | 329.1                                  | 81.4 | 9641 | 348.9 | 85.6  | 10128 |
| 15  | 335.4                                  | 83.1 | 7891 | 368.0 | 90.4  | 8024  |
| 16  | 338.1                                  | 83.6 | 7974 | 379.1 | 93.3  | 7752  |
| 17  | 339.4                                  | 85.3 | 8741 | 398.1 | 97.1  | 8787  |
| 18  | 344.1                                  | 87.4 | 7447 | 405.1 | 98.9  | 7220  |
| 19  | 342.6                                  | 89.0 | 5866 | 408.3 | 99.6  | 4896  |
| 20  | 346.9                                  | 88.0 | 3930 | 418.0 | 101.5 | 3178  |

Supplementary Table 4

| BSA <sup>2)</sup> (m <sup>2</sup> ) | BWTAR <sup>1)</sup> (mm <sup>2</sup> ) |       |       |       |       |       |
|-------------------------------------|----------------------------------------|-------|-------|-------|-------|-------|
|                                     | girls                                  |       |       | boys  |       |       |
|                                     | mean                                   | SD    | n     | mean  | SD    | n     |
| 0.3                                 | 108.0                                  | 34.8  | 14    | 105.3 | 39.9  | 6     |
| 0.4                                 | 127.0                                  | 38.4  | 1190  | 127.7 | 39.3  | 823   |
| 0.5                                 | 133.1                                  | 35.9  | 6220  | 136.1 | 36.6  | 5717  |
| 0.6                                 | 142.5                                  | 36.1  | 11792 | 144.3 | 36.6  | 12629 |
| 0.7                                 | 159.0                                  | 38.3  | 11864 | 158.4 | 37.7  | 12450 |
| 0.8                                 | 179.1                                  | 41.7  | 12130 | 178.4 | 41.1  | 12377 |
| 0.9                                 | 200.4                                  | 46.9  | 11528 | 198.0 | 44.9  | 12136 |
| 1.0                                 | 222.9                                  | 52.7  | 10480 | 219.0 | 49.6  | 11592 |
| 1.1                                 | 250.4                                  | 60.0  | 8935  | 237.2 | 54.8  | 10632 |
| 1.2                                 | 278.0                                  | 67.0  | 8725  | 259.7 | 60.0  | 9416  |
| 1.3                                 | 303.8                                  | 73.1  | 13357 | 283.3 | 66.3  | 8590  |
| 1.4                                 | 322.3                                  | 76.6  | 22338 | 312.4 | 73.6  | 8715  |
| 1.5                                 | 340.0                                  | 81.3  | 21862 | 338.8 | 78.4  | 11195 |
| 1.6                                 | 359.3                                  | 87.5  | 11328 | 363.6 | 84.3  | 15047 |
| 1.7                                 | 385.7                                  | 97.2  | 3681  | 388.6 | 89.5  | 13795 |
| 1.8                                 | 408.2                                  | 109.6 | 1109  | 410.7 | 96.6  | 8970  |
| 1.9                                 | 438.8                                  | 114.8 | 305   | 433.8 | 100.0 | 4001  |
| 2.0                                 | 433.7                                  | 121.6 | 54    | 456.0 | 108.0 | 1751  |
| 2.1                                 |                                        |       |       | 486.6 | 115.4 | 730   |
| 2.2                                 |                                        |       |       | 491.7 | 124.3 | 309   |
| 2.3                                 |                                        |       |       | 522.2 | 126.8 | 53    |

Supplementary Table 5

| girls |        |      |        |      |      |      |      | boys |        |      |        |       |      |      |       |
|-------|--------|------|--------|------|------|------|------|------|--------|------|--------|-------|------|------|-------|
| Age   | Height |      | Weight |      | BSA  |      | n    | Age  | Height |      | Weight |       | BSA  |      | n     |
|       | mean   | SD   | mean   | SD   | mean | SD   |      |      | mean   | SD   | mean   | SD    | mean | SD   |       |
| 0     | 70.28  | 4.09 | 8.40   | 0.96 | 0.39 | 0.03 | 127  | 0    | 72.06  | 4.66 | 9.00   | 1.04  | 0.41 | 0.03 | 148   |
| 1     | 78.47  | 4.81 | 9.97   | 1.21 | 0.45 | 0.04 | 1701 | 1    | 80.09  | 4.95 | 10.57  | 1.23  | 0.47 | 0.04 | 1838  |
| 2     | 86.83  | 4.85 | 11.98  | 1.50 | 0.52 | 0.04 | 5446 | 2    | 87.95  | 4.85 | 12.48  | 1.56  | 0.54 | 0.05 | 5761  |
| 3     | 94.21  | 4.67 | 13.94  | 1.77 | 0.59 | 0.05 | 8485 | 3    | 95.08  | 4.62 | 14.38  | 1.77  | 0.61 | 0.05 | 8997  |
| 4     | 101.11 | 5.23 | 15.93  | 2.12 | 0.66 | 0.06 | 8266 | 4    | 101.84 | 5.15 | 16.28  | 2.16  | 0.67 | 0.06 | 8711  |
| 5     | 107.95 | 5.44 | 18.02  | 2.67 | 0.73 | 0.07 | 7509 | 5    | 108.53 | 5.33 | 18.36  | 2.72  | 0.74 | 0.07 | 7808  |
| 6     | 114.57 | 5.66 | 20.46  | 3.39 | 0.80 | 0.08 | 8829 | 6    | 115.36 | 5.65 | 21.03  | 3.73  | 0.82 | 0.08 | 9405  |
| 7     | 120.74 | 5.75 | 23.24  | 4.34 | 0.88 | 0.09 | 9203 | 7    | 121.27 | 5.79 | 23.73  | 4.60  | 0.89 | 0.09 | 9768  |
| 8     | 126.10 | 5.98 | 26.15  | 5.32 | 0.96 | 0.10 | 9196 | 8    | 127.03 | 5.92 | 27.15  | 5.83  | 0.98 | 0.11 | 9493  |
| 9     | 132.15 | 6.59 | 29.80  | 6.58 | 1.05 | 0.12 | 8928 | 9    | 132.38 | 6.32 | 30.82  | 7.16  | 1.06 | 0.13 | 9370  |
| 10    | 138.57 | 7.13 | 33.77  | 7.59 | 1.14 | 0.14 | 9047 | 10   | 137.67 | 6.52 | 34.49  | 8.13  | 1.14 | 0.14 | 9736  |
| 11    | 145.25 | 7.11 | 38.36  | 8.12 | 1.25 | 0.14 | 9588 | 11   | 143.65 | 7.34 | 38.81  | 9.42  | 1.24 | 0.16 | 9802  |
| 12    | 150.75 | 6.19 | 43.08  | 8.50 | 1.35 | 0.14 | 9519 | 12   | 150.75 | 8.13 | 43.72  | 10.31 | 1.35 | 0.17 | 10183 |
| 13    | 153.86 | 5.60 | 46.10  | 7.85 | 1.41 | 0.12 | 9579 | 13   | 158.23 | 8.01 | 48.71  | 10.26 | 1.47 | 0.17 | 9929  |
| 14    | 155.73 | 5.43 | 48.72  | 7.66 | 1.45 | 0.12 | 9641 | 14   | 163.87 | 7.10 | 53.41  | 10.44 | 1.57 | 0.16 | 10128 |
| 15    | 156.68 | 5.29 | 50.46  | 7.70 | 1.48 | 0.11 | 7891 | 15   | 167.48 | 6.25 | 57.67  | 10.43 | 1.64 | 0.15 | 8024  |
| 16    | 157.11 | 5.33 | 51.37  | 7.44 | 1.50 | 0.11 | 7974 | 16   | 169.37 | 5.99 | 60.17  | 10.37 | 1.69 | 0.14 | 7752  |
| 17    | 157.46 | 5.40 | 51.98  | 7.52 | 1.51 | 0.11 | 8741 | 17   | 170.22 | 5.83 | 62.18  | 10.64 | 1.72 | 0.14 | 8787  |
| 18    | 157.66 | 5.40 | 52.46  | 8.04 | 1.51 | 0.12 | 7447 | 18   | 170.86 | 5.90 | 63.46  | 10.83 | 1.74 | 0.15 | 7220  |
| 19    | 157.66 | 5.36 | 52.28  | 7.91 | 1.51 | 0.11 | 5866 | 19   | 171.03 | 5.90 | 63.71  | 10.68 | 1.74 | 0.14 | 4896  |
| 20    | 157.76 | 5.32 | 52.38  | 7.88 | 1.51 | 0.11 | 3930 | 20   | 170.99 | 5.95 | 63.91  | 11.17 | 1.74 | 0.15 | 3178  |
